# Supplementary material for: Histologic and biochemical alterations predict pulmonary mechanical dysfunction in aging mice with chronic lung inflammation
Source: PubMed Central journal article supplement (PMC5570219; doi:10.1371/journal.pcbi.1005570), 2017-08-24

**Figure S3: Residual Model Errors with and without Differential Recruitment**

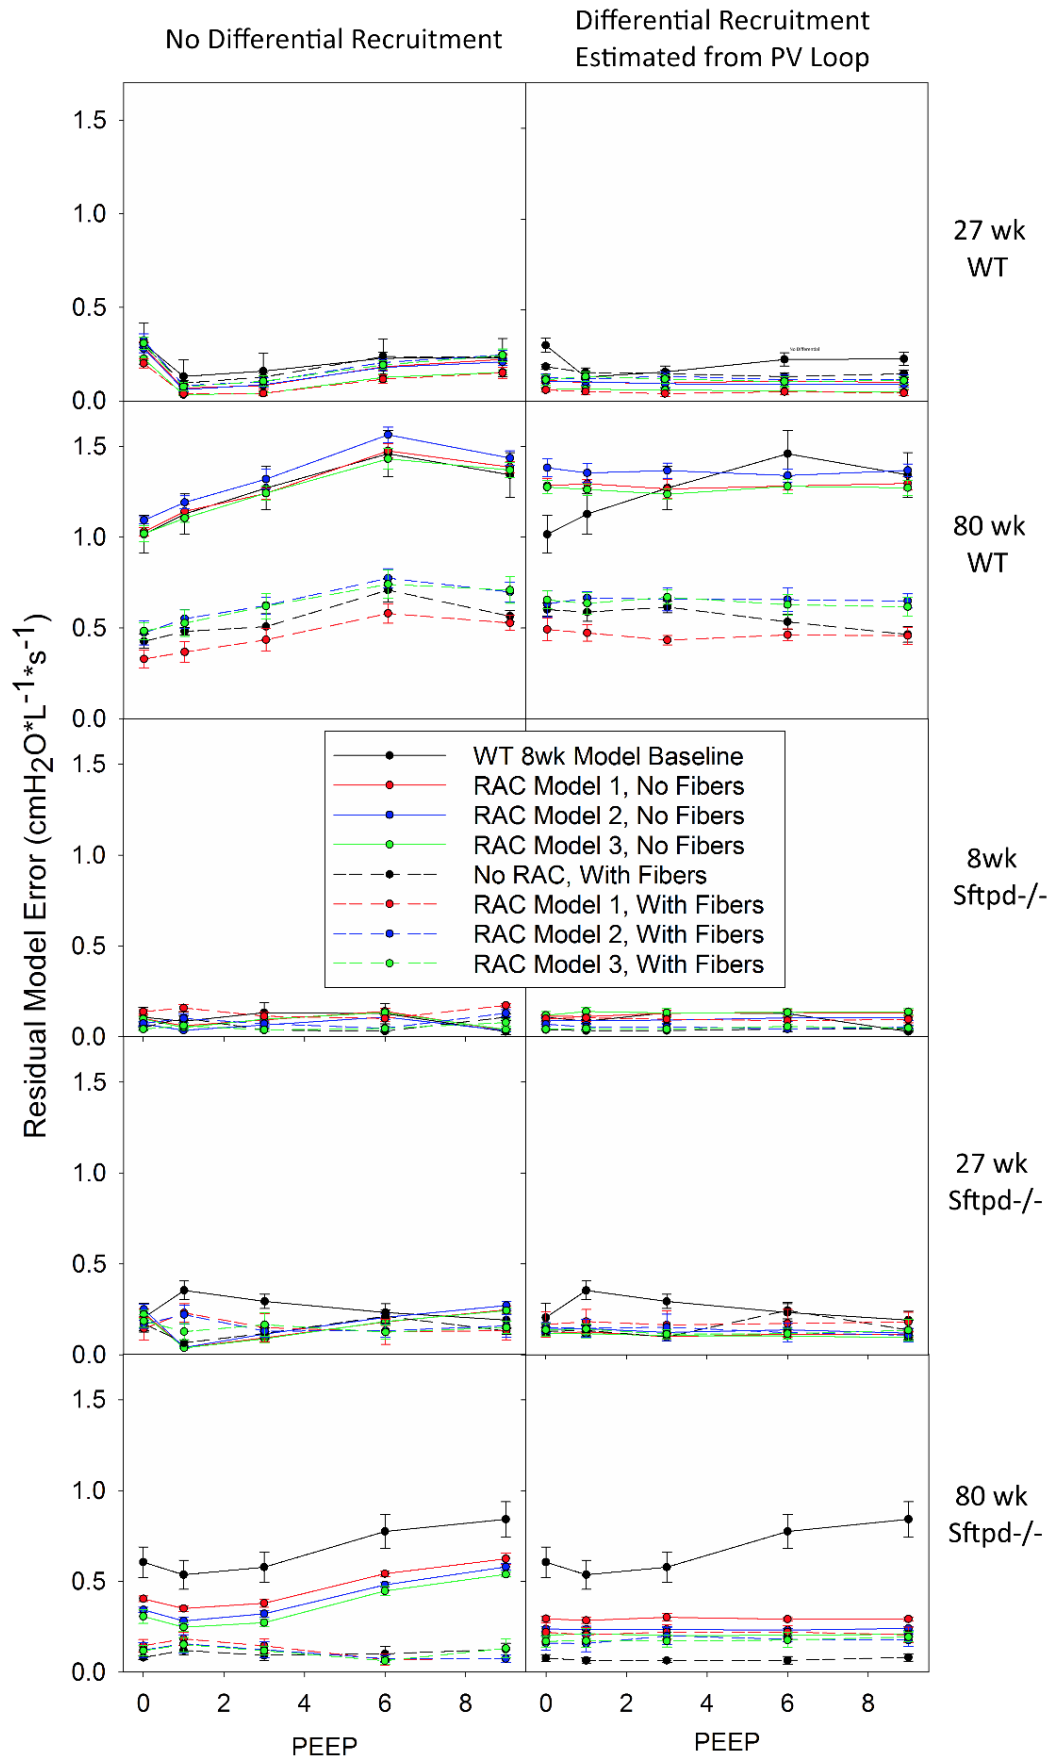

Supplement: pcbi.1005570.s004.pdf [file pcbi.1005570.s004.pdf]
