# Supplementary material for: Histologic and biochemical alterations predict pulmonary mechanical dysfunction in aging mice with chronic lung inflammation
Source: PubMed Central journal article supplement (PMC5570219; doi:10.1371/journal.pcbi.1005570), 2017-08-24

**Figure S5: Representative spectra of the best fit model shown with experimental data.** Experimental (black) and simulated (red) spectra for each experimental condition are shown. Simulated spectra from the model with the maximum likelihood are shown as mean  $\pm$  95% confidence interval determined from repeated simulation. Experimental data are mean  $\pm$  standard error.

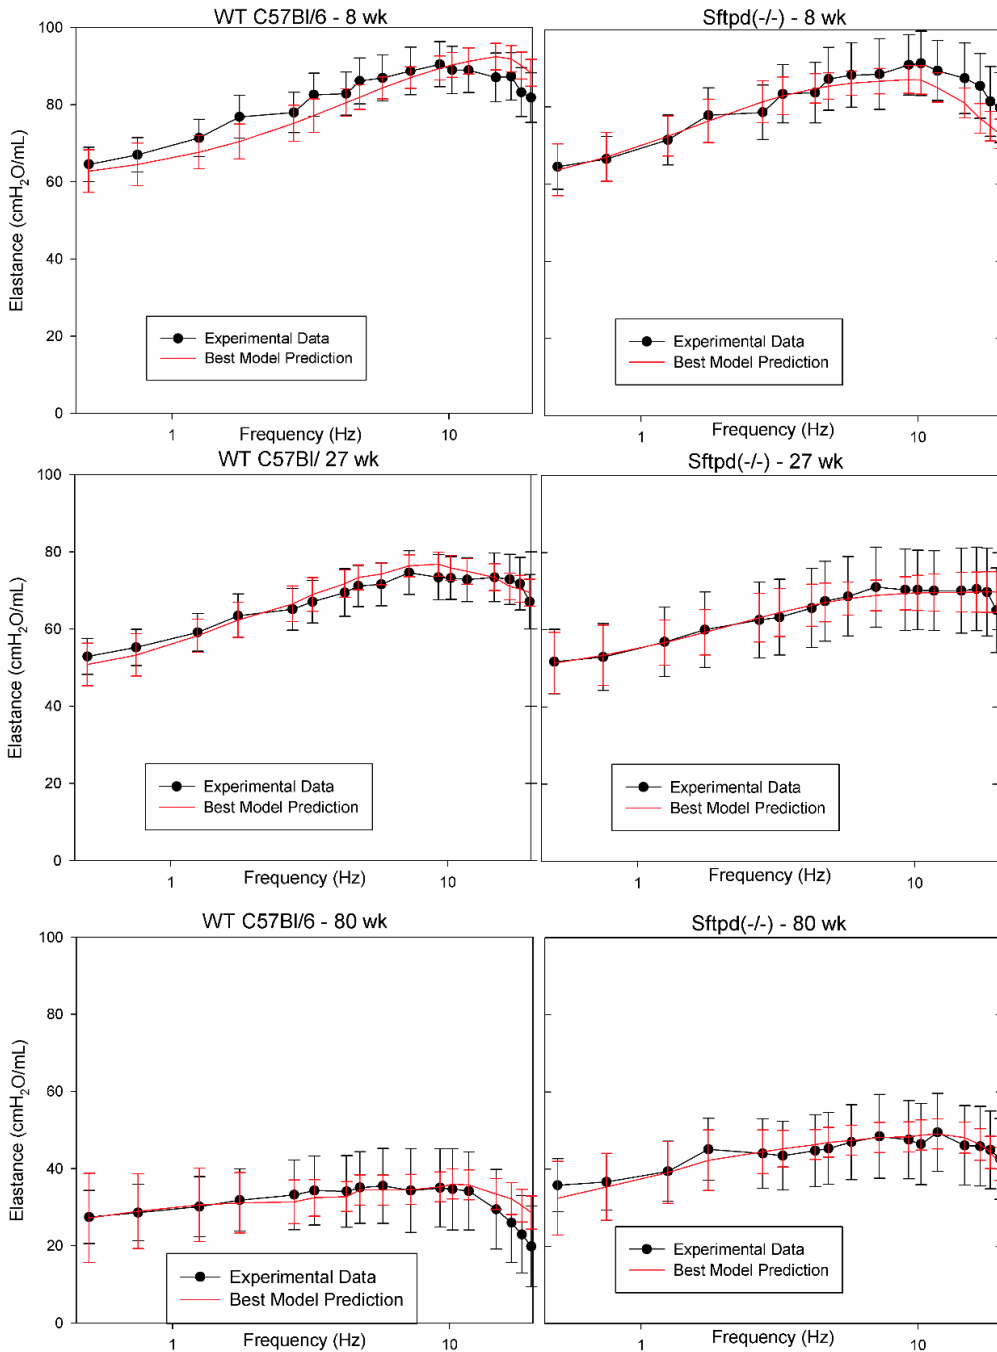

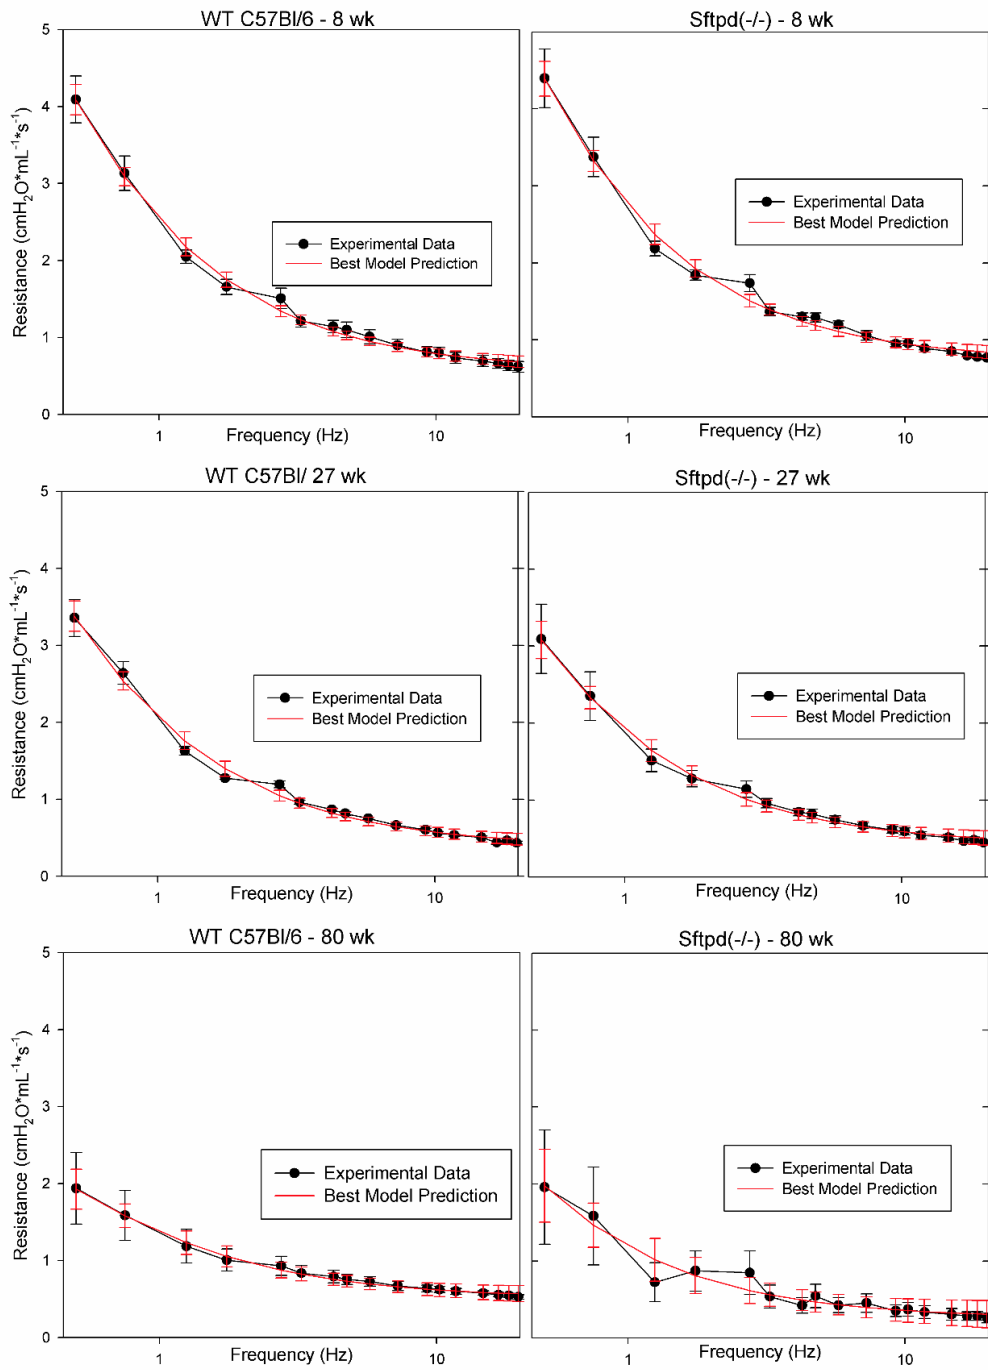

Supplement: pcbi.1005570.s006.pdf [file pcbi.1005570.s006.pdf]
